# Supplementary material for: Linc02381 Exacerbates Rheumatoid Arthritis Through Adsorbing miR-590-5p and Activating the Mitogen-Activated Protein Kinase Signaling Pathway in Rheumatoid arthritis-fibroblast-like synoviocytes
Source: PubMed Central journal article supplement — Cell Transplant. 2020 Jul 1;29:0963689720938023. doi: 10.1177/0963689720938023 (PMC7563894; doi:10.1177/0963689720938023), 2020-07-01
Supplement: Supplementary_table_1.pdf [file Supplementary_table_1.pdf]

Supplementary table 1. Basic information of patients with rheumatoid arthritis.

| Number | Gender | Age | Diagnostic time | RA classification level |
|--------|--------|-----|-----------------|-------------------------|
| 1      | Male   | 47  | 2018/4/12       | 6                       |
| 2      | Female | 44  | 2019/2/10       | 7                       |
| 3      | Male   | 51  | 2018/3/15       | 6                       |
| 4      | Male   | 46  | 2017/12/12      | 7                       |
| 5      | Male   | 40  | 2017/12/27      | 8                       |
| 6      | Female | 52  | 2018/5/2        | 6                       |
| 7      | Male   | 55  | 2018/4/26       | 6                       |
| 8      | Male   | 46  | 2018/7/7        | 6                       |
| 9      | Male   | 43  | 2018/6/25       | 7                       |
| 10     | Female | 50  | 2018/7/4        | 6                       |
| 11     | Male   | 52  | 2018/4/17       | 7                       |
| 12     | Male   | 51  | 2018/6/13       | 7                       |
| 13     | Female | 43  | 2017/11/13      | 9                       |
| 14     | Male   | 48  | 2017/12/4       | 6                       |
| 15     | Female | 49  | 2017/12/25      | 6                       |
| 16     | Male   | 40  | 2018/2/23       | 7                       |
| 17     | Male   | 42  | 2017/9/28       | 8                       |
| 18     | Male   | 42  | 2019/1/11       | 6                       |
| 19     | Male   | 51  | 2017/6/25       | 6                       |
| 20     | Female | 54  | 2018/3/23       | 6                       |
| 21     | Female | 49  | 2018/3/14       | 6                       |
| 22     | Male   | 44  | 2018/1/16       | 6                       |
| 23     | Male   | 45  | 2019/1/12       | 7                       |
| 24     | Male   | 41  | 2019/2/13       | 7                       |

Note: Number of joints involved (0 ~ 5); Serological antibody test (0 ~ 3); Synovitis duration (0 ~ 1); Acute reactant (0 ~ 1). If the sum of these four aspects exceeds 6 points, the subject is diagnosed as RA patients. The involved joints include middle and large joints and small joints; the detection of serum antibody includes two indexes of rheumatoid factor (RF) and anti cyclic citrullinated peptide antibody (anti CCP); the duration of synovitis is divided by six weeks; the acute reactants include two indexes of C-reactive protein (CRP) and erythrocyte sedimentation rate (ESR).
